# Supplementary material for: Vesicle to micelle transition in the ternary mixture of L121/SDS/D2O: NMR, EPR and SANS studies
Source: Royal Society of Chemistry journal article supplement (doi:10.1039/c7cp06796h), 2017-01-01
Supplement: c7cp06796h1.pdf [file c7cp06796h1.pdf]

## Electronic Supplementary Information (ESI)

### SANS Model

SANS is a well-established technique for determining the structures of self-assembled amphiphilic molecules. It essentially provides differential scattering cross-section per unit volume as a function of wave vector transfer ( $Q$ ), which for monodispersed particles can be expressed as<sup>1,2</sup>:

$$\frac{d\Sigma}{d\Omega}(Q) = nP(Q)S(Q) + B \quad (1)$$

Where  $n$  is the number density of the scatterers.  $P(Q)$  is intra-particle structure factor, which is basically the orientational average of the square of the form factor  $F(Q)$ . The shape information of the particles is reflected in the intermediate  $Q$ -range, where for standard shapes such as cylindrical it has  $1/Q$  dependence,  $1/Q^2$  for vesicles and  $1/Q^4$  for multi-lamellar vesicles.  $S(Q)$  is the Fourier transform of the radial distribution function  $g(r)$  for the mass centers of the particles and is known as inter-particle structure factor.  $P(Q)$  is decided by the shape and size (structural parameters) of the scatterers while  $S(Q)$  provides information about interaction among them. For a dilute system, where the interparticle distance between the scatterers is large enough,  $S(Q)$  may be considered as unity. Finally  $B$  represents a constant term corresponding to the incoherent background originating mostly from the hydrogen present in the system.

For vesicles following equation for core-shell model having inner radius  $R$  and thickness  $dR$  can be used<sup>3</sup>

$$F(Q) = \frac{16\pi^2}{9}(\rho_p - \rho_s)^2 [(R + dR)^3 \frac{\sin Q(R + dR) - Q(R + dR)\cos Q(R + dR)}{Q^3(R + dR)^3} - R^3 \frac{\sin QR - QR\cos QR}{Q^3 R^3}]^2 \quad (2)$$

Where  $\rho_p$  and  $\rho_s$  are the scattering length densities of particle and solvent, respectively.

For prolate ellipsoidal particles,  $P(Q)$  can be expressed as

$$P(Q) = \frac{16\pi^2}{9} (\rho_p - \rho_s)^2 (ab^2)^2 \int_0^1 [F(Q, \mu)]^2 d\mu \quad (3)$$

where the functions are given by

$$F(Q, \mu) = \frac{3(\sin x - x \cos x)}{x^3} \quad (4)$$

and  $x = Q[a^2\mu^2 + b^2(1-\mu^2)]^{1/2}$ , where  $a$  and  $b=c$  are, respectively semi-major and semi-minor axes of prolate ellipsoid ( $a > b=c$ ). The variable  $\mu$  is the cosine of the angle between the directions of  $a$  and  $Q$ .

For charged micellar system,  $S(Q)$  is usually calculated by using the Hayter and Penfold analysis under rescaled mean spherical approximation (RMSA), which assumes screened Coulomb interaction between the charged particles.<sup>4</sup> For the two populations (micelles and vesicles) present in the system, total scattering intensity is calculated by summing up the scattering contributions from two scatterer entities. The % volume fraction of the micelles is then calculated from the pre-factor of the scattering term corresponding to the micelles.

The aggregation numbers of the monomers in the mixed micelles having prolate ellipsoidal shape were calculated using following eqn<sup>5</sup>:

$$N = \frac{4\pi ab^2}{3V_m} \quad (5)$$

Here,  $V_m$  can be calculated from their respective average surfactant monomer volumes,  $V_{mSDS}$  and  $V_{mL121}$

$$\bar{V}_m = (V_{mSDS} \times X_{SDS}) + (V_{mL121} \times X_{L121}) \quad (6)$$

Where  $X_{SDS}$  and  $X_{L121}$  are the mole fractions of SDS and L121, respectively.  $V_{mSDS} = 350.2 \text{ \AA}^3$ ;

$V_{mL121} = 7100 \text{ \AA}^3$ .

## References

- 1 J. S. Pedersen, *Adv. Colloid Interface Sci.*, 1997, **70**, 171–210.
- 2 S. H. Chen, E. Y. Sheu, J. Kalus and H. Hoffmann, *J. Appl. Crystallogr.*, 1988, **21**, 751–769.
- 3 R. Kaur, S. Kumar, V. K. Aswal and R. K. Mahajan, *Langmuir*, 2013, **29**, 11821–11833.
- 4 J.-P. Hansen and J. B. Hayter, *Mol. Phys.*, 1982, **46**, 651–656.
- 5 G. Ghosh, V. K. Aswal and D. Varade, *Pramana J. Phys.*, 2008, **71**, 1063–1067.
